# Supplementary material
Source: publisher figshare collection journal article supplement (https://sage.figshare.com/ndownloader/files/16587884)
Supplement: Supplementary file 1 [file 16587884]

## Supplementary data

### Neuroprotective and memory-enhancing effects of antioxidant peptide from walnut (*Juglans regia* L.) protein hydrolysates

Mingchuan Liu<sup>a¶</sup>, Shengjie Yang<sup>a¶</sup>, Jinping Yang<sup>a</sup>, Yita Lee<sup>c</sup>, Junping Kou<sup>b\*\*</sup>, and Chaojin Wang<sup>a,c\*</sup>

<sup>a</sup> *R&D Center, Sinphar Tian-Li Pharmaceutical Co., Ltd., Hangzhou 31100, China*

<sup>b</sup> *Department of Complex Prescription of TCM, China Pharmaceutical University, Nanjing 211198, China*

<sup>c</sup> *R&D Center, Sinphar Pharmaceutical Co., Ltd., Ilan (Taiwan) 269, Republic of China*

<sup>¶</sup>Both authors contributed equally to this work.

\*Corresponding author. Sinphar Tian-Li Pharmaceutical Co., Ltd., Yuhang Economic & Technological Development Zone, Hangzhou, China 311100. Tel.: +86 571 8616 8933; Fax: +86 571 8616 8991.

E-mail address: wangzr1960@126.com

\*\*Corresponding author. Department of Complex Prescription of TCM, China Pharmaceutical University, Jiangning St., Nanjing, China 211198. Tel.: +86 25 8618 5158; Fax: +86 25 8618 5158.

E-mail address: [koujp1966@126.com](mailto:koujp1966@126.com)

Table 1S. Effect of WP on the target time and crossing times of scopolamine-induced acquisition impairment in the Morris water maze test.

| Groups           | Dose (mg/kg) | Target-time (s)          | Crossing-times (N)      |
|------------------|--------------|--------------------------|-------------------------|
| Normal control   | -            | 34.2 ± 6.1               | 2.4 ± 0.5               |
| Negative control | -            | 25.8 ± 2.3 <sup>##</sup> | 1.7 ± 0.7 <sup>#</sup>  |
| Nmodipine        | 30           | 29.4 ± 8.2               | 3.8 ± 1.9 <sup>**</sup> |
| Low-dose WP      | 30           | 30.3 ± 4.9 <sup>*</sup>  | 2.8 ± 1.6               |
| Medium-dose WP   | 100          | 29.1 ± 3.9 <sup>*</sup>  | 2.8 ± 1.2 <sup>*</sup>  |
| High-dose WP     | 300          | 27.7 ± 5.9               | 4.7 ± 1.5 <sup>**</sup> |

<sup>#</sup>  $P < 0.05$  compared with normal control group, <sup>##</sup>  $P < 0.01$  compared with normal control group, <sup>\*</sup>  $P < 0.05$  compared with negative control group, <sup>\*\*</sup>  $P < 0.01$  compared with negative control group.

Table 2S. Effect of WP on the escape latency of sodium nitrite-induced consolidation impairment in the Morris water maze test.

| Groups           | Dose (mg/kg) | Escape latency (s)                 |                                   |
|------------------|--------------|------------------------------------|-----------------------------------|
|                  |              | Before injection of sodium nitrite | After injection of sodium nitrite |
| Normal control   | -            | 14.4 ± 10.5                        | 12.0 ± 14.1                       |
| Negative control | -            | 21.3 ± 20.3                        | 27.6 ± 34.8                       |
| Nmodipine        | 30           | 20.8 ± 13.3                        | 18.9 ± 14.9                       |
| Low-dose WP      | 30           | 18.1 ± 14.4                        | 8.1 ± 11.7                        |
| Medium-dose WP   | 100          | 12.0 ± 4.7                         | 10.8 ± 6.4                        |
| High-dose WP     | 300          | 13.3 ± 11.2                        | 4.7 ± 4.2                         |

Table 3S. Effect of WP on the target time and crossing times of ethanol-induced reproduction impairment in the Morris water maze test.

| Groups           | Dose (mg/kg) | Target-time (s)          | Crossing-times (N)      |
|------------------|--------------|--------------------------|-------------------------|
| Normal control   | -            | 35.1 ± 5.7               | 3.5 ± 2.3               |
| Negative control | -            | 26.2 ± 4.5 <sup>##</sup> | 0.9 ± 1.0 <sup>##</sup> |

|                |     |             |            |
|----------------|-----|-------------|------------|
| Nmodipine      | 30  | 35.0 ± 8.9  | 1.7 ± 1.7  |
| Low-dose WP    | 30  | 30.8 ± 9.5  | 0.9 ± 1.4  |
| Medium-dose WP | 100 | 25.4 ± 5.8  | 0.8 ± 0.6  |
| High-dose WP   | 300 | 32.2 ± 7.4* | 3.8 ± 4.2* |

##  $P < 0.01$  compared with normal control group, \*  $P < 0.05$  compared with negative control group.

Table 4S. Effect of WP on sodium nitrite-induced consolidation impairment in the step-down test.

| Groups           | Dose (mg/kg) | Step-down latency (s) | Error times (N) |
|------------------|--------------|-----------------------|-----------------|
| Normal control   | -            | 221.2 ± 70.6          | 1.0 ± 0.95      |
| Negative control | -            | 94.7 ± 49.3##         | 3.6 ± 2.5##     |
| Nmodipine        | 30           | 237.7 ± 79.7**        | 1.0 ± 1.2**     |
| Low-dose WP      | 30           | 252.8 ± 72.7**        | 0.4 ± 0.6**     |
| Medium-dose WP   | 100          | 273.2 ± 43.7**        | 0.7 ± 1.5**     |
| High-dose WP     | 300          | 240.7 ± 66.8**        | 0.8 ± 1.0**     |

##  $P < 0.01$  compared with normal control group, \*\*  $P < 0.01$  compared with negative control group.

Table5S. Effect of WP on ethanol-induced reproduction impairment in the step-down test.

| Groups           | Dose (mg/kg) | Step-down latency (s) | Error times (N) |
|------------------|--------------|-----------------------|-----------------|
| Normal control   | -            | 212.0 ± 84.2          | 0.8 ± 0.9       |
| Negative control | -            | 46.3 ± 26.5##         | 5.7 ± 2.9##     |
| Nmodipine        | 30           | 99.6 ± 98.7           | 2.5 ± 1.4*      |
| Low-dose WP      | 30           | 199.3 ± 75.5**        | 2.0 ± 2.0**     |
| Medium-dose WP   | 100          | 142.1 ± 113.5**       | 2.8 ± 2.2*      |
| High-dose WP     | 300          | 146.1 ± 73.8**        | 3.2 ± 3.4       |

##  $P < 0.01$  compared with normal control group, \*  $P < 0.05$  compared with negative control group, \*\*  $P < 0.01$

compared with negative control group.
